# Supplementary material for: Carcinoembryonic antigen carrying SLeX as a new biomarker of more aggressive gastric carcinomas
Source: PubMed Central journal article supplement (PMC6831293; doi:10.7150/thno.33858), 2019-10-11
Supplement: thnov09p7431s1.pdf [file thnov09p7431s1.pdf]

# Supplementary Material

## Tables

**Table S1: SLe<sup>x</sup> antigen positive proteins identified from MST3Gal IV cell using MALDI-TOF-MS/MS.** The list of peptides obtained from Mascot can be found in the supplementary material.

| <i>Spot ID</i> | <i>Protein description</i>                                | <i>UniProtKB Accession number</i> | <i>Number of identified peptides</i> | <i>% Sequence coverage</i> | <i>Protein score*</i> |
|----------------|-----------------------------------------------------------|-----------------------------------|--------------------------------------|----------------------------|-----------------------|
| 1              | Carcinoembryonic antigen-related cell adhesion molecule 5 | P06731                            | 4                                    | 8                          | 92                    |
| 2              | Ras GTPase-activating-like protein IQGAP1                 | P46940                            | 35                                   | 21                         | 268                   |
|                | Carcinoembryonic antigen-related cell adhesion molecule 5 | P06731                            | 5                                    | 10                         | 234                   |

\* Protein scores greater than 56 are considered significant ( $p < 0.05$ )

**Table S2 - List of released *N*-glycans detected on immunoprecipitated CEA (500 ng) from Mock and ST3GalIV cell lines.** *N*-glycans were released from immunoprecipitated CEA using PNGase F, analyzed by PGC-nanoLC-ESI-MS/MS and qualitatively and quantitatively assessed. Each *N*-glycan has an identification number (ID), a detected *m/z* (Detected [M-H]<sup>-</sup>), a theoretical *m/z* (Theor. [M-H]<sup>-</sup>), a mass error in Da ( $\Delta M$ ), retention time in minutes (RT), proposed structure and relative abundances for CEA derived from Mock and MST3GalIV cells. The monosaccharides are represented following the recommendation of the SNFG<sup>28</sup>.

| ID | Detected [M-H] <sup>-</sup> | Theor. [M-H] <sup>-</sup> | $\Delta M$ (Da) | RT (min) | Structure | Relative abundances(%) |           |
|----|-----------------------------|---------------------------|-----------------|----------|-----------|------------------------|-----------|
|    |                             |                           |                 |          |           | Mock                   | MST3GalIV |
| 1  | 1235.49                     | 1235.44                   | 0.05            | 25.1     |           | 2.139                  | 2.034     |
| 2  | 1397.55                     | 1397.49                   | 0.06            | 19.1     |           | 12.902                 | 10.821    |
| 3  | 1559.58                     | 1559.55                   | 0.03            | 19.1     |           | 7.593                  | 8.104     |
| 4  | 1559.60                     | 1559.55                   | 0.06            | 18.0     |           | 5.445                  | 8.595     |
| 5  | 1721.79                     | 1721.60                   | 0.19            | 19.0     |           | 17.020                 | 15.928    |
| 6  | 1883.76                     | 1883.65                   | 0.10            | 18.0     |           | 20.185                 | 18.254    |
| 7  | 1875.83                     | 1875.67                   | 0.15            | 24.3     |           | 2.761                  | 0.000     |
| 8  | 1875.77                     | 1875.67                   | 0.09            | 32.9     |           | 0.000                  | 2.243     |

|    |         |         |      |      |                                                                                     |       |       |
|----|---------|---------|------|------|-------------------------------------------------------------------------------------|-------|-------|
| 9  | 1891.75 | 1891.67 | 0.08 | 22.6 | 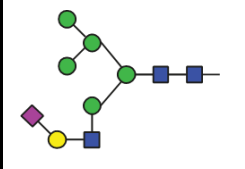   | 2.817 | 1.438 |
| 10 | 2078.80 | 2078.75 | 0.04 | 29.1 |    | 4.934 | 2.273 |
| 11 | 2224.89 | 2224.81 | 0.08 | 27.5 |    | 8.866 | 0.000 |
| 12 | 2281.83 | 2281.83 | 0.01 | 21.1 |    | 2.893 | 0.000 |
| 13 | 2281.85 | 2281.83 | 0.01 | 26.9 |   | 0.000 | 1.824 |
| 14 | 2572.91 | 2572.93 | 0.02 | 21.6 |  | 4.272 | 0.000 |
| 15 | 2572.94 | 2572.93 | 0.01 | 27.9 |  | 1.687 | 3.133 |
| 16 | 2572.93 | 2572.93 | 0.00 | 35.4 |  | 0.000 | 7.041 |
| 17 | 2369.92 | 2369.85 | 0.07 | 28.6 |  | 6.485 | 0.000 |
| 18 | 2369.87 | 2369.85 | 0.02 | 37.1 |  | 0.000 | 5.370 |

|    |         |         |      |      |                                                                                   |       |        |
|----|---------|---------|------|------|-----------------------------------------------------------------------------------|-------|--------|
| 19 | 2369.86 | 2369.85 | 0.01 | 43.4 | 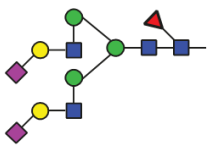 | 0.000 | 12.942 |
|----|---------|---------|------|------|-----------------------------------------------------------------------------------|-------|--------|

# Figures

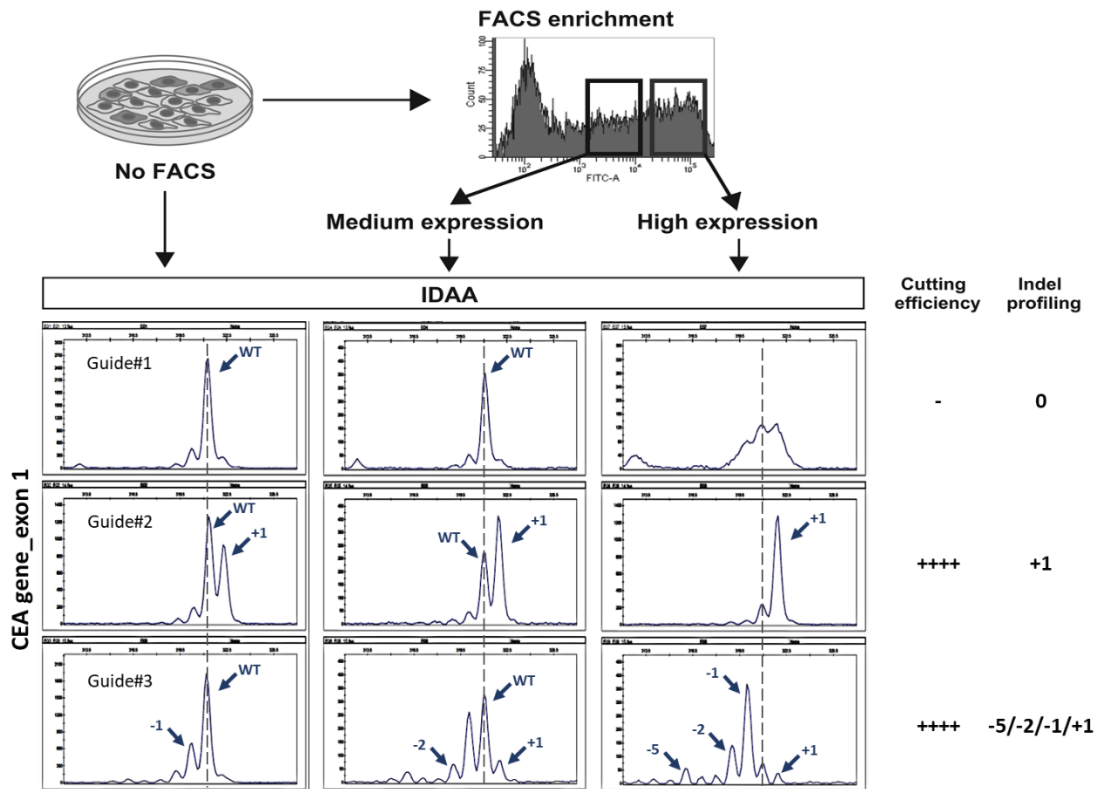

**Figure S1 – CEA gRNA selection and validation using FACS enrichment and IDAA monitoring.** IDAA profiles for the three different gRNAs designs (Guide #1–3) monitored in the original pool of transfected HEK293T cells and after FACS enrichment for cells with medium or high Cas9-GFP expression. Guide#1 showed no cutting efficiency whereas Guide#2 displayed the highest cutting efficiency with a rather homogenous +1 indel, which was easily detectable even in the original cell pool. Guide#3 displayed lower efficiency compared to Guide#2, detectable after enrichment for GFP expression with heterogeneous indel formation.

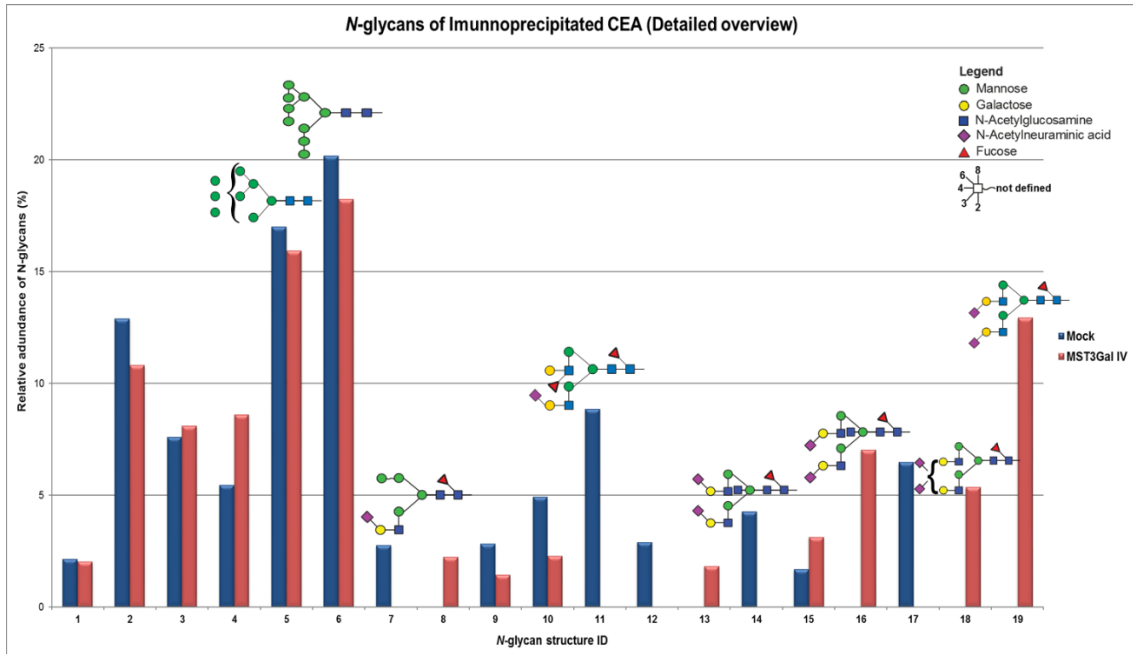

**Figure S2 – Overview of N-glycans identified on immunoprecipitated CEA from Mock and MST3GalIV cell lines.** The N-glycan ID numbers were represented along the horizontal axis against the relative abundance (%) of N-glycans in the vertical axis. The relative abundances of each individual N-glycan of CEA is different in Mock or MST3GalIV cells.
